# Supplementary material for: Initial Stage of Formation of Spontaneous Invasive Populations of Garden Lupine (Lupinus polyphyllus Lindl.) at the Northern Limit of Its Secondary Distribution Range in the Veps Forest Nature Park
Source: MDPI journal article supplement (doi:10.3390/agronomy12102466), 2022-10-11
Supplement: s1 [file s1]

**Table S1.** Samples of *Lupinus polyphyllus* locations and GenBank accession numbers.

| DNA sample no. | Place of collection                                                                                           | Year of collection | Collectors                      | Voucher | GB accession no. |            |
|----------------|---------------------------------------------------------------------------------------------------------------|--------------------|---------------------------------|---------|------------------|------------|
|                |                                                                                                               |                    |                                 |         | ITS              | rpl32-trnL |
| LP1            | Saint-Petersburg                                                                                              | 1999               | no data                         | LE      | –                | OP007323   |
| LP2            | Leningrad Oblast                                                                                              | 1993               | no data                         | LE      | –                | OP007324   |
| LT1            | Tula, Lazo street. 51°09'50" N, 37°36'32" E                                                                   | 2005               | L.V. Khorun                     | MHA     | ON968485         | OP007326   |
| LT2            |                                                                                                               |                    |                                 |         | ON968486         | OP007327   |
| LK1            | Kaluga Oblast, Yukhnov district, near Gorodets village. 54°27'43" N, 35°01'30" E                              | 2014               | N.M. Reshetnikova, A.A. Asoskov | MHA     | ON968483         | OP007320   |
| LK2a           | Kaluga Oblast, Zhukov district, Olkhovo village. 55°11'20" N, 36°57'36" E                                     | 1990               | V.D. Bochkin                    | MHA     | ON968484         | OP007321   |
| LK2b           |                                                                                                               |                    |                                 |         | –                | OP007322   |
| LS1            | Smolensk Oblast, Demidov district, near Borovichi village. 55°17'25"N, E31°29'46"E                            | 2008               | V.D. Bochkin                    | MHA     | –                | OP007325   |
| LV1a           | Leningrad Oblast, Podporozhye district, Veps Forest Nature Park, Lukinskaya village. 60°27'35" N, 34°50'04" E | 2022               | M.A. Galkina, V.N. Zelenkova    | MHA     | ON968487         | OP007328   |
| LV1b           |                                                                                                               |                    |                                 |         | ON968488         | OP007329   |
| LV1c           |                                                                                                               |                    |                                 |         | ON968489         | OP007330   |
| LV1d           |                                                                                                               |                    |                                 |         | –                | OP007331   |
| LV1e           |                                                                                                               |                    |                                 |         | ON968490         | OP007332   |
| LV2a           | Leningrad Oblast, Podporozhye district, Veps Forest Nature Park, Kurba village. 60°23'58" N, 34°56'03" E      | 2022               | M.A. Galkina, V.N. Zelenkova    | MHA     | ON968491         | OP007333   |
| LV2b           |                                                                                                               |                    |                                 |         | ON968492         | OP007334   |
| LV2c           |                                                                                                               |                    |                                 |         | ON968493         | OP007335   |
| LV2d           |                                                                                                               |                    |                                 |         | ON968494         | OP007336   |
| LV2e           |                                                                                                               |                    |                                 |         | –                | OP007337   |
| LV3            | Leningrad Oblast, Podporozhye district, Veps Forest Nature Park, Fenkovo village. 60°28'39" N, 34°29'51"E     | 2022               | M.A. Galkina, V.N. Zelenkova    | MHA     | ON968495         | OP007338   |
| LV4a           | Leningrad Oblast, Podporozhye district, Veps Forest Nature Park, Vinnitsy village. 60°37'44" N, 34°45'47 E    | 2022               | M.A. Galkina, V.N. Zelenkova    | MHA     | ON968496         | OP007339   |
| LV4b           |                                                                                                               |                    |                                 |         | ON968497         | OP007340   |
| LV4c           |                                                                                                               |                    |                                 |         | ON968498         | OP007341   |
| LV4d           |                                                                                                               |                    |                                 |         | –                | OP007342   |
